# Supplementary material
Source: Springer Nature journal article supplement (https://www.springermedizin.de/resource/supplementary/12882_2013_751_MOESM1_ESM.pdf/9454644)

Scatter Plot with Passing & Bablok Fit

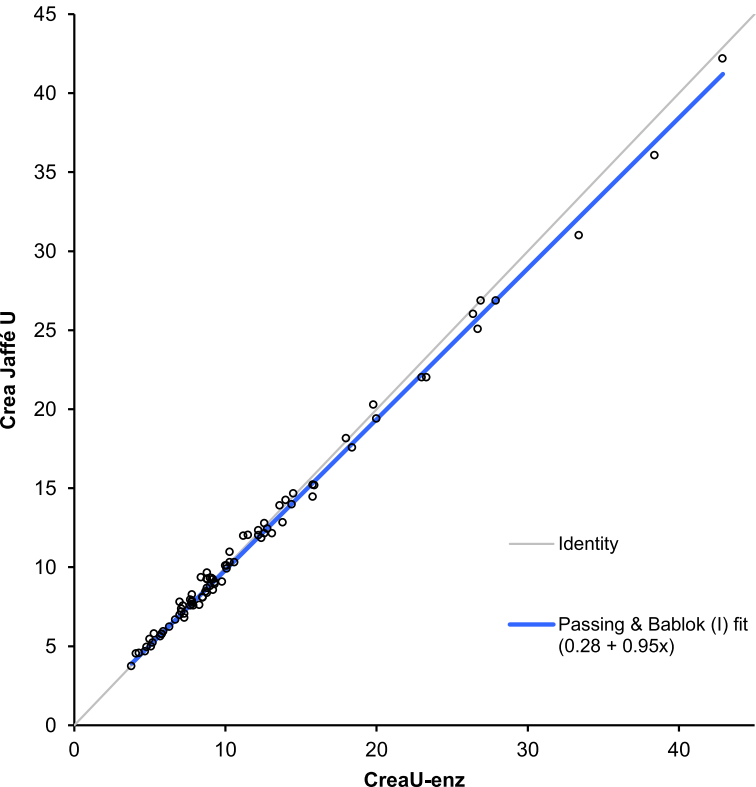

Supplement: MOESM1 [file 9454644]
